# Supplementary figures and images for: Structure and properties of novel M(dmit)2 salts with the Me3N+TEMPO cation radical (Me3N+TEMPO = N,N,Ntrimethyl(1oxyl2,2,6,6tetramethylpiperidin4yl)ammonium)
Source: Royal Society of Chemistry journal article supplement (doi:10.1039/b008424g), 2001-01-01

**Fig. S1** Projection of the structure of (Me3N-TEMPO)2[M(dmit)2] (M = Ni, Pd) in the *ab* plane.


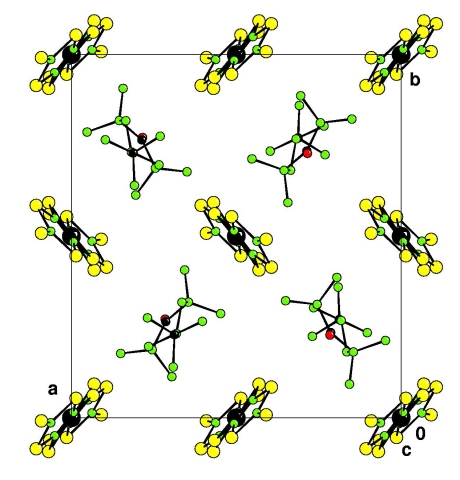

Supplement: b008424g1.doc [file b008424g1.doc]
